# Supplementary figures and images for: Increased advanced glycation end product and meat consumption is associated with childhood wheeze: analysis of the National Health and Nutrition Examination Survey
Source: HighWire-hosted journal article supplement (doi:10.1136/thoraxjnl-2020-216109), 2020-12-21

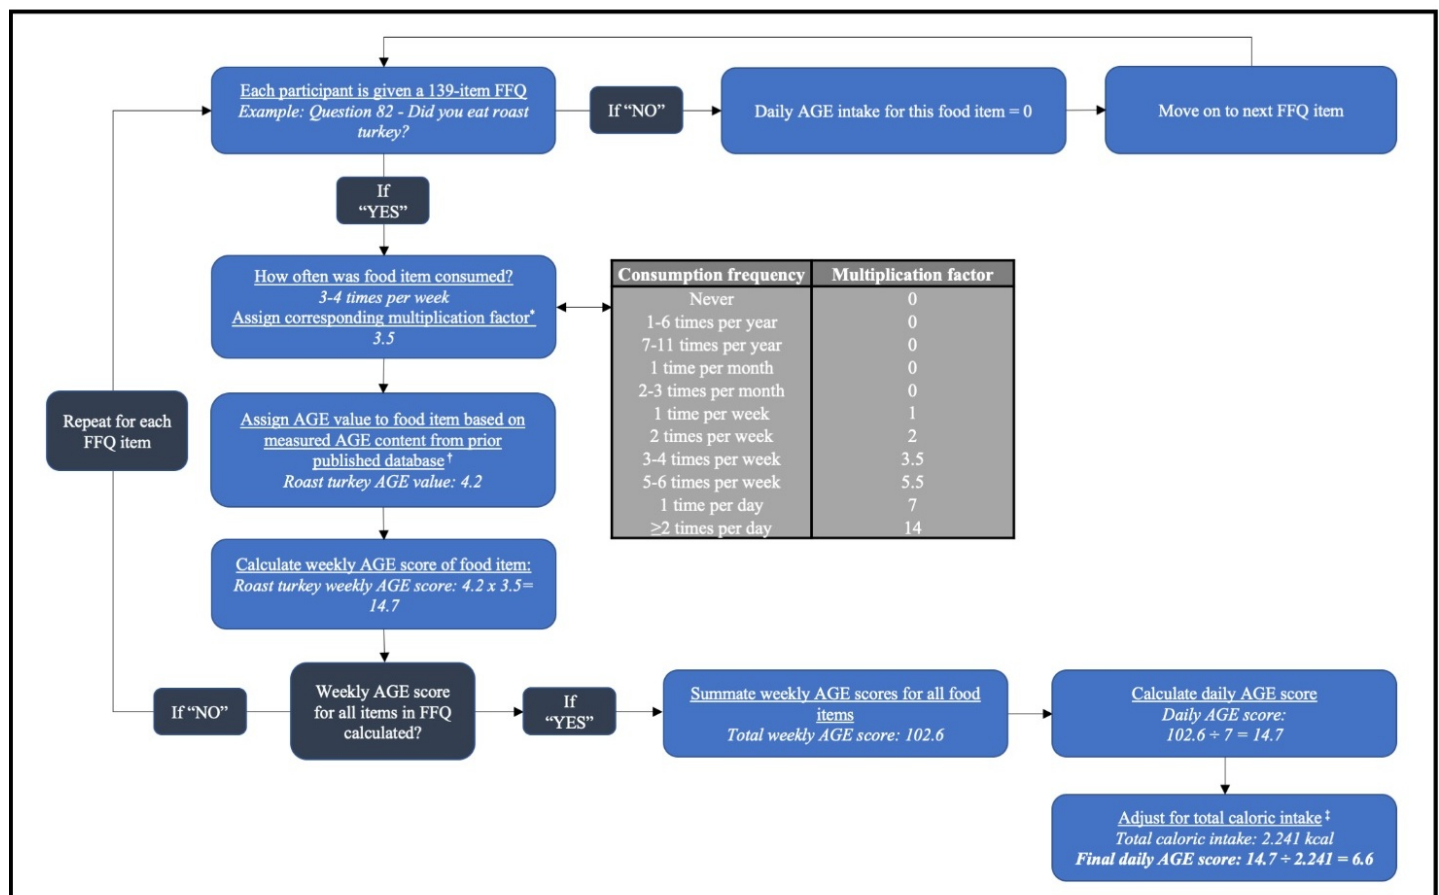

Supplement: thoraxjnl-2020-216109supp002_data_supplement.pdf [file thoraxjnl-2020-216109supp002_data_supplement.pdf]

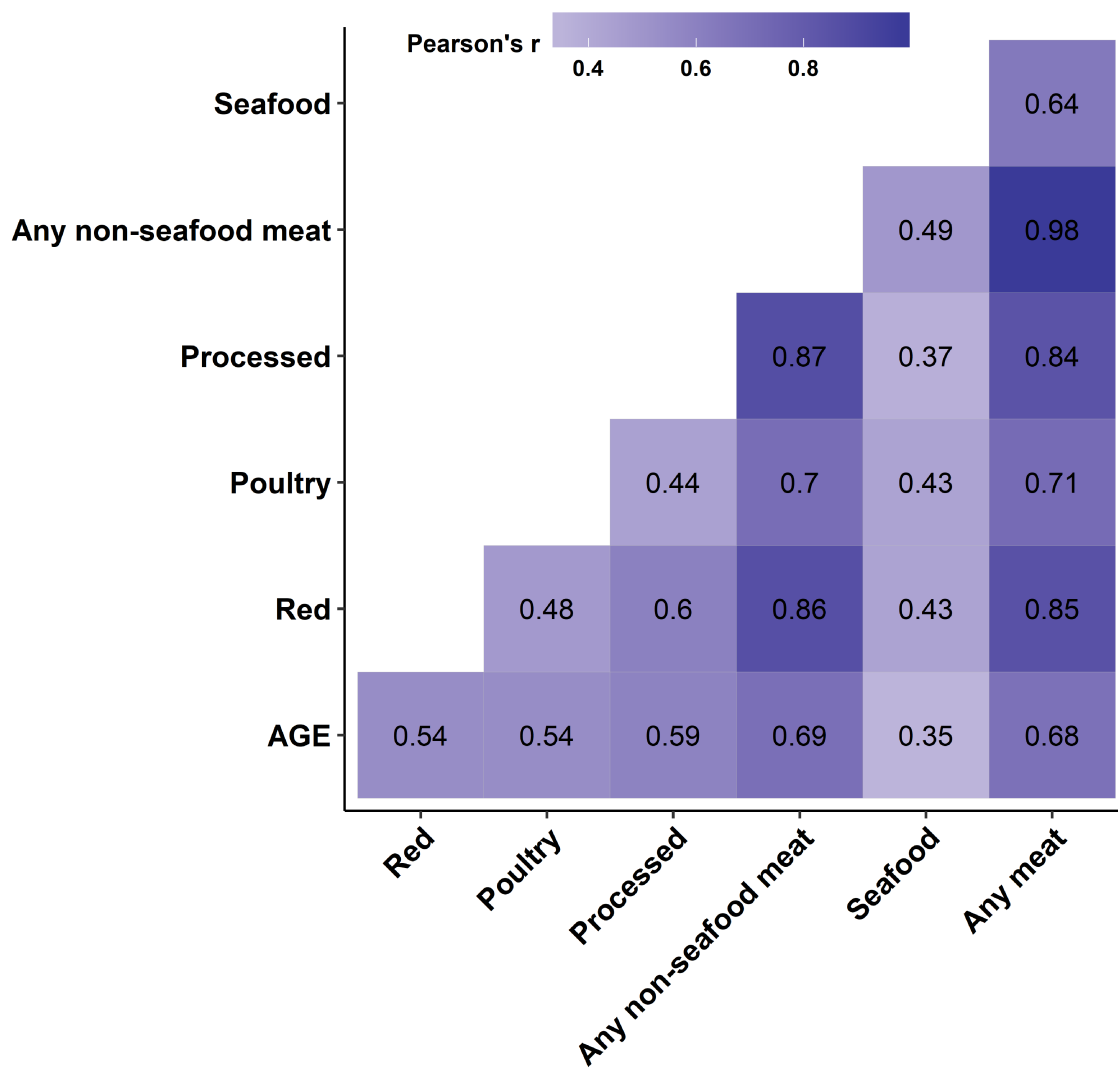

Supplement: thoraxjnl-2020-216109supp003_data_supplement.pdf [file thoraxjnl-2020-216109supp003_data_supplement.pdf]
